# Supplementary material for: Epidemiology, Patients’ Journey and Healthcare Costs in Early-Stage Non-Small-Cell Lung Carcinoma: A Real-World Evidence Analysis in Italy
Source: Pharmaceuticals (Basel). 2023 Feb 27;16(3):363. doi: 10.3390/ph16030363 (PMC10056991; doi:10.3390/ph16030363)
Supplement: Supplementary file 1 [file pharmaceuticals-16-00363-s001.zip › pharmaceuticals-2229823-supplementary.pdf]

## Supplementary Materials

**Table S1.** Recurrence and time to recurrence in eNSCLC patients who received chemotherapy after surgery in stage II-IIIa (study period 01/2015–06/2021).

|                                                      | Stage II           | Stage IIIa         |
|------------------------------------------------------|--------------------|--------------------|
| <b>Patients with recurrence, %</b>                   | 55.6%              | 63.6%              |
| Months to recurrence, mean ( $\pm$ SD)               | 11.8 ( $\pm$ 10.8) | 16.1 ( $\pm$ 18.0) |
| Months to recurrence, median [min-max]               | 6.3 [1.5–29.5]     | 11.0 [0.6–67.1]    |
| <b>Patients with loco-regional recurrence, %</b>     | 0.0%               | 0.0%               |
| Months to loco-regional recurrence, mean ( $\pm$ SD) | /                  | /                  |
| Months to recurrence, median [min-max]               | /                  | /                  |
| <b>Patients with metastatic recurrence, %</b>        | 55.6%              | 63.6%              |
| <b>Patients with distant recurrence, %</b>           | 44.4%              | 36.4%              |
| Months to distant recurrence, mean ( $\pm$ SD)       | 12.4 ( $\pm$ 12.0) | 13.0 ( $\pm$ 13.1) |
| Months to recurrence, median [min-max]               | 6.2 [1.5–29.5]     | 5.0 [0.6–38.3]     |
| <b>Patients with unspecified recurrence, %</b>       | 11.1%              | 27.3%              |
| Months to unspecified recurrence, mean ( $\pm$ SD)   | 9.3 ( $\pm$ 4.3)   | 20.3 ( $\pm$ 23.8) |
| Months to recurrence, median [min-max]               | 6.3 [6.3–12.3]     | 14.1 [0.8–67.1]    |

Note: Calculated only for patients with available stage reported in Pathological Anatomy Database ( $N = 40$ ): hence, data should be interpreted with caution in view of the smaller sample size of the subgroups.

**Table S2.** Demographic and clinical characteristics of NSCLC patients treated with chemotherapy after surgery in stage II-IIIa with recurrence (study period 01/2015–06/2021). Continuous variables are presented as mean  $\pm$  SD, categorical variables as numbers and percentages in brackets.

|                                          | <b>Patients with loco-regional<br/>recurrence (<i>n</i> = 23)</b> | <b>Patients with metastatic<br/>recurrence (<i>n</i> = 217)</b> |
|------------------------------------------|-------------------------------------------------------------------|-----------------------------------------------------------------|
| Age, years, mean ( $\pm$ SD)             | 67.0 ( $\pm$ 8.3)                                                 | 67.8 ( $\pm$ 8.5)                                               |
| Age categories (by 10 years)             |                                                                   |                                                                 |
| 18-39, n (%)                             | 0 (0%)                                                            | NR                                                              |
| 40-59, n (%)                             | 6 (26.1%)                                                         | 37 (17.1%)                                                      |
| 60-69, n (%)                             | 3 (13.0%)                                                         | 74 (34.1%)                                                      |
| 70-79, n (%)                             | 13 (56.5%)                                                        | 92 (42.4%)                                                      |
| 80-89, n (%)                             | NR                                                                | 13 (6.0%)                                                       |
| Male gender, n (%)                       | 8 (34.8%)                                                         | 135 (62.2%)                                                     |
| Glasheen index (score), mean ( $\pm$ SD) | 0.9 ( $\pm$ 0.8)                                                  | 0.8 ( $\pm$ 0.9)                                                |
| Glasheen index (categories)              |                                                                   |                                                                 |
| <1, n (%)                                | 8 (34.8%)                                                         | 101 (46.5%)                                                     |
| 1, n (%)                                 | 10 (43.5%)                                                        | 80 (36.9%)                                                      |
| 2+, n (%)                                | 5 (21.7%)                                                         | 36 (16.6%)                                                      |

**Table S3.** Distribution of patients with metastatic recurrence based on the number of metastatic sites

| Number of metastatic sites             | Patients, <i>n</i> (%) |
|----------------------------------------|------------------------|
| not reported in the DB ( <i>n</i> , %) | 45 (20.7%)             |
| 1 ( <i>n</i> , %)                      | 72 (33.2%)             |
| 2 ( <i>n</i> , %)                      | 47 (21.7%)             |
| 3 ( <i>n</i> , %)                      | 39 (18.0%)             |
| ≥4 ( <i>n</i> , %)                     | 14 (6.5%)              |

**Table S4.** Healthcare resource use during first 3 years of follow-up among alive eNSCLC patients treated with CT after surgery in stage II-IIIa - study period 01/2015-06/2018.

|                                               | One-year follow-up |             | Two-years follow-up |             | Three-years follow-up |             |
|-----------------------------------------------|--------------------|-------------|---------------------|-------------|-----------------------|-------------|
|                                               | Mean ( $\pm$ SD)   | N (%)       | Mean ( $\pm$ SD)    | N (%)       | Mean ( $\pm$ SD)      | N (%)       |
| Prescriptions of drugs related to lung cancer | 2.8 ( $\pm$ 4.2)   | 56 (41.2%)  | 1.6 ( $\pm$ 3.8)    | 28 (20.6%)  | 2.5 ( $\pm$ 5.7)      | 35 (25.7%)  |
| Prescriptions of other drugs                  | 15.2 ( $\pm$ 6.0)  | 136 (100%)  | 8.9 ( $\pm$ 5.1)    | 135 (99.3%) | 9.1 ( $\pm$ 6.0)      | 133 (97.8%) |
| Test                                          | 22.2 ( $\pm$ 15.7) | 136 (100%)  | 11.1 ( $\pm$ 10.1)  | 134 (98.5%) | 13.1 ( $\pm$ 12.4)    | 133 (97.8%) |
| Visits                                        | 9.2 ( $\pm$ 5.9)   | 133 (97.8%) | 6.7 ( $\pm$ 5.3)    | 133 (97.8%) | 6.5 ( $\pm$ 6.3)      | 129 (94.9%) |
| Fibrobronchoscopy                             | 0.2 ( $\pm$ 0.5)   | 20 (14.7%)  | NI                  | NI          | NI                    | NI          |
| PET / CT and CT scan                          | 3.9 ( $\pm$ 1.7)   | 132 (97.1%) | 2.6 ( $\pm$ 1.5)    | 126 (92.6%) | 2.4 ( $\pm$ 1.6)      | 124 (91.2%) |
| Nuclear magnetic resonance                    | 0.0 ( $\pm$ 0.0)   | 0 (0%)      | 0.0 ( $\pm$ 0.0)    | 0 (0%)      | NI                    | NI          |
| Lung cancer hospitalizations                  | 1.5 ( $\pm$ 1.0)   | 134 (98.5%) | 0.1 ( $\pm$ 0.4)    | 13 (9.6%)   | 0.1 ( $\pm$ 0.5)      | 14 (10.3%)  |
| Other hospitalizations                        | 0.7 ( $\pm$ 1.1)   | 61 (44.9%)  | 0.3 ( $\pm$ 0.8)    | 27 (19.9%)  | 0.4 ( $\pm$ 1.0)      | 30 (22.1%)  |

**Table S5.** Healthcare resource direct costs during first 3 years of follow-up among alive eNSCLC patients with CT after surgery in stage II-IIIa - study period 01/2015–06/2018

| NSCLC Patients with CT after surgery in stage II-IIIa (N=136) |                             |
|---------------------------------------------------------------|-----------------------------|
|                                                               | Cost per patient (€)        |
| <b>One-year follow-up</b>                                     |                             |
| Prescriptions of drugs related to lung cancer, mean (±SD)     | 2,842.6 (±10,323.7)         |
| Prescriptions of other drugs, mean (±SD)                      | 853.2 (±698.5)              |
| Visits/tests, mean (±SD)                                      | 5,192.8 (±4128.1)           |
| Lung cancer hospitalizations, mean (±SD)                      | 10,243.0 (±3393.7)          |
| Other hospitalizations, mean (±SD)                            | 2,741.9 (±4787.3)           |
| <i>TOTAL</i>                                                  | <i>21,873.4 (±12,960.2)</i> |
| <b>Two-years follow-up</b>                                    |                             |
| Prescriptions of drugs related to lung cancer, mean (±SD)     | 3,749.4 (±10,471.6)         |
| Prescriptions of other drugs, mean (±SD)                      | 683.6 (±819.2)              |
| Visits/tests, mean (±SD)                                      | 3,062.5 (±3949.7)           |
| Lung cancer hospitalizations, mean (±SD)                      | 671.1 (±2645.5)             |
| Other hospitalizations, mean (±SD)                            | 1,099.1 (±3465.0)           |
| <i>TOTAL</i>                                                  | <i>9,265.7 (±12,831.5)</i>  |
| <b>Three-years follow-up</b>                                  |                             |
| Prescriptions of drugs related to lung cancer, mean, SD)      | 3,661.1 (±10,692.5)         |
| Prescriptions of other drugs, mean (±SD)                      | 745.6 (±1205.9)             |
| Visits/tests, mean (±SD)                                      | 2,993.5 (±4528.8)           |
| Lung cancer hospitalizations, mean (±SD)                      | 693.6 (±2758.3)             |
| Other hospitalizations, mean (±SD)                            | 1,910.5 (±5543.3)           |
| <i>TOTAL</i>                                                  | <i>10,004.2 (±14,059.6)</i> |

**Table S6.** Type of recurrent metastases evaluated with the related ICD-9-CM codes.

| Type of metastases                  | ICD-9-CM codes                |
|-------------------------------------|-------------------------------|
| Brain metastasis                    | 198.3                         |
| Bone metastasis                     | 198.5                         |
| Liver metastasis                    | 197.7                         |
| Other respiratory organs metastasis | 197.0, 197.1, 197.2, 197.3    |
| Adrenal gland metastasis            | 198.7                         |
| Peritoneum metastasis               | 197.6                         |
| Lymph nodes metastasis              | 196 (excluded 196.1)          |
| Other metastasis                    | 197, 198 not considered above |

**Table S7.** Treatments in analysis

| <b>Treatment</b>        | <b>Identification codes</b>                                                                                         |
|-------------------------|---------------------------------------------------------------------------------------------------------------------|
| Aspecific chemotherapy  | DRG code: 410 OR hospital/ambulatory procedures 99.25, 99.28, 99.29 OR ATC L01 excluded the treatments listed below |
| Pemetrexed              | ATC code L01BA04                                                                                                    |
| Nivolumab               | ATC code L01XC17                                                                                                    |
| Durvalumab              | ATC code L01XC28                                                                                                    |
| Atezolizumab            | ATC code L01XC32                                                                                                    |
| Pembrolizumab           | ATC code L01XC18                                                                                                    |
| Gefitinib               | ATC code L01XE02/L01EB01                                                                                            |
| Erlotinib               | ATC code L01XE03/L01EB02                                                                                            |
| Afatinib                | ATC code L01XE13/L01EB03                                                                                            |
| Crizotinib              | ATC code L01XE16/L01ED01                                                                                            |
| Ceritinib               | ATC code L01XE28/L01ED02                                                                                            |
| Osimertinib             | ATC code L01XE35/L01EB04                                                                                            |
| Alectinib               | ATC code L01XE36/L01ED03                                                                                            |
| Dabrafenib + Trametinib | ATC code L01XE23/L01EC02 + L01XE25/L01EE01                                                                          |
| Radiotherapy            | (ICD9 V580 or procedure 922, 923)                                                                                   |

(A)

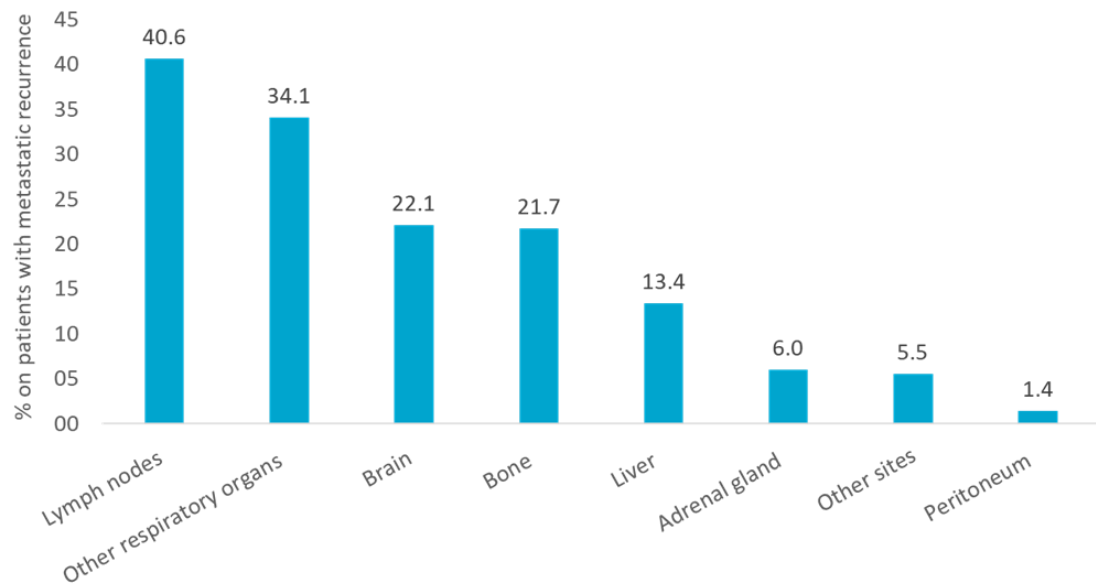

(B)

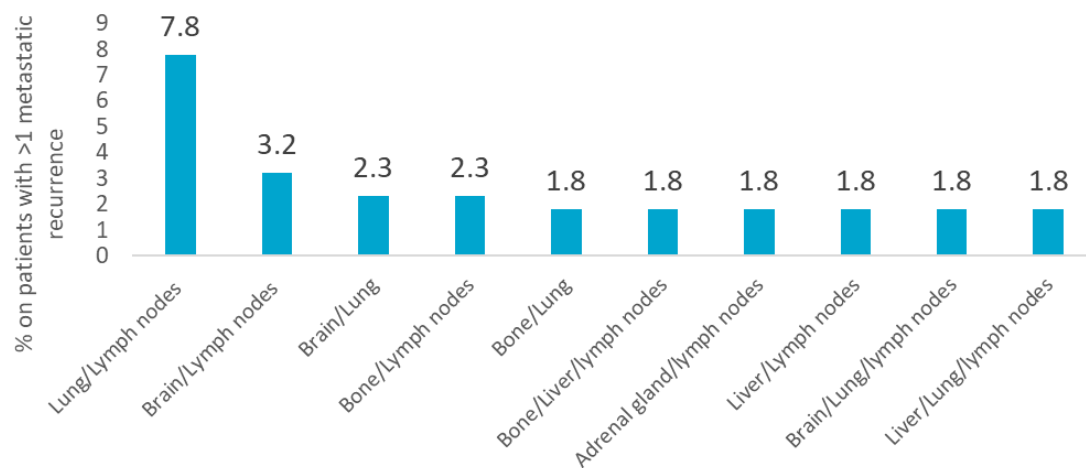

**Figure S1. (A)** Proportion of eNSCLC patients treated with chemotherapy after surgery in stage II- IIIA experiencing metastatic recurrence according to the different sites (study period 01/2015-06/2021). **(B)** Among patient who experienced more than one recurrent metastasis, the proportion of combinations of the various metastatic sites were reported.
